# Supplementary material for: Extensive genetic diversity of Rickettsiales bacteria in multiple mosquito species
Source: PubMed Central journal article supplement (PMC5146937; doi:10.1038/srep38770), 2016-12-09
Supplement: srep38770-s1.pdf [file srep38770-s1.pdf]

# **Extensive genetic diversity of Rickettsiales bacteria in multiple mosquito species**

Wen-Ping Guo<sup>a1</sup>, Jun-Hua Tian<sup>b1</sup>, Xian-Dan Lin<sup>c</sup>, Xue-Bing Ni<sup>a</sup>, Xiao-Ping Chen<sup>a</sup>, Yong Liao<sup>d</sup>, Si-Yuan Yang<sup>a</sup>, J. Stephen Dumler<sup>e</sup>, Edward C. Holmes<sup>af</sup>, Yong-Zhen Zhang<sup>a2</sup>

<sup>a</sup>State Key Laboratory of Infectious Disease Prevention and Control, Department of Zoonoses, National Institute for Communicable Disease Control and Prevention, Chinese Center for Disease Control and Prevention, Beijing; Collaborative Innovation Center for Diagnosis and Treatment of Infectious Diseases, Hangzhou, China.

<sup>b</sup>Wuhan Center for Disease Control and Prevention, Wuhan, Hubei Province, China.

<sup>c</sup>Wenzhou Center for Disease Control and Prevention, Wenzhou, Zhejiang Province, China.

<sup>d</sup>Ganzhou Center for Disease Control and Prevention, Ganzhou, Jiangxi Province, China.

<sup>e</sup>Department of Pathology, Uniformed Services University for the Health Sciences, Bethesda, MD 20814, USA.

<sup>f</sup>Marie Bashir Institute for Infectious Diseases and Biosecurity, Charles Perkins Centre, School of Life and Environmental Sciences and Sydney Medical School, The University of Sydney, Sydney, NSW 2006, Australia.

<sup>1</sup>These authors contributed equally to this article.

<sup>2</sup>Correspondence to: Dr. Yong-Zhen Zhang, State Key Laboratory of Infectious Disease Prevention and Control, National Institute of Communicable Disease Control and Prevention, Chinese Center for Disease Control and Prevention, Changping Liuzi 5, Beijing, 102206, China. Tel: 086-10-58900782; Email: zhangyongzhen@icdc.cn.

Supplementary Table S1. Bacterial sequences obtained in this study.

| Strains                   | Genes(nt)                 |                |              | Bacteria <sup>a</sup>     |
|---------------------------|---------------------------|----------------|--------------|---------------------------|
|                           | <i>rrs</i>                | <i>gltA</i>    | <i>groEL</i> |                           |
| <i>Anopheles sinensis</i> |                           |                |              |                           |
| Egg                       |                           |                |              |                           |
| WHANSE-2                  | 1400 (99.2%) <sup>b</sup> | - <sup>c</sup> | -            | <i>A. platys</i>          |
| WHANSE-2-1                | 330 (99.1%)               | -              | -            | <i>A. marginale</i>       |
| Larvae                    |                           |                |              |                           |
| WHANSL-11-1               | 343 (100%)                | -              | -            | <i>A. marginale</i>       |
| WHANSL-11                 | 345 (97.0%)               | -              | -            | <i>A. phagocytophilum</i> |
| WHANSL-24-1               | 342 (98.5%)               | -              | -            | <i>A. marginale</i>       |
| WHANSL-24                 | 345 (98.6%)               | -              | -            | <i>A. bovis</i>           |
| WHANSL-27-1               | 1430 (99.6%)              | 838 (58.5%)    | 1050 (84.9%) | <i>A. platys</i>          |
| WHANSL-27-2               | 1380 (99.5%)              | -              | 862 (98.8%)  | <i>A. marginale</i>       |
| WHANSL-30                 | 337 (98.8%)               | -              | -            | <i>A. phagocytophilum</i> |
| WHANSL-34                 | 346 (96.4%)               | -              | -            | <i>A. phagocytophilum</i> |
| WHANSL-36                 | 353 (98.0%)               | -              | -            | <i>A. phagocytophilum</i> |
| WHANSL-41                 | 343 (99.1%)               | -              | -            | <i>A. marginale</i>       |
| WHANSL-8-1                | 342 (99.7%)               | -              | -            | <i>A. marginale</i>       |
| WHANSL-8                  | 1440 (97.8%)              | -              | -            | <i>A. bovis</i>           |
| WHANSL-16                 | 355 (96.1%)               | -              | -            | <i>A. phagocytophilum</i> |
| WHANSL-LabF50             | 650 (100%)                | -              | -            | <i>R. japonica</i>        |
| WHANSL-LabF52             | 650 (100%)                | -              | -            | <i>R. japonica</i>        |
| WHANSL-LabF59             | 650 (100%)                | -              | -            | <i>R. japonica</i>        |
| Pupae                     |                           |                |              |                           |
| WHANSP-48-1               | 342 (96.8%)               | -              | -            | <i>A. phagocytophilum</i> |
| WHANSP-48                 | 1402 (99.4%)              | -              | 580 (92.7%)  | <i>C. A. boleense</i>     |
| WHANSP-5-1                | 342 (99.1%)               | -              | -            | <i>A. marginale</i>       |
| WHANSP-60                 | 240 (98.7%)               | -              | -            | <i>C. N. mik</i>          |
| WHANSP-LabF85             | 1100 (99.6%)              | -              | -            | <i>R. japonica</i>        |
| WHANSP-LabF100            | 650 (100%)                | -              | -            | <i>R. japonica</i>        |
| WHANSP-LabF101            | 1100 (100%)               | -              | -            | <i>R. japonica</i>        |
| WHANSP-LabF106            | 650 (100%)                | -              | -            | <i>R. japonica</i>        |
| Adult                     |                           |                |              |                           |
| JXANSA-19-1               | 400 (99.2)                | -              | -            | <i>A. bovis</i>           |
| JXANSA-19                 | 1434 (99.3%)              | 832 (57.6%)    | 1035 (83.6%) | <i>A. platys</i>          |
| JXANSA-2                  | 1378 (99.3%)              | -              | 859 (98.7%)  | <i>A. marginale</i>       |
| JXANSA-24                 | 1377 (99.1%)              | -              | -            | <i>A. marginale</i>       |
| JXANSA-30-1               | 381 (98.4%)               | -              | -            | <i>A. bovis</i>           |
| JXANSA-30                 | 340 (98.8%)               | -              | -            | <i>A. platys</i>          |
| JXANSA-34                 | 333 (99.4%)               | -              | -            | <i>A. marginale</i>       |
| JXANSA-8                  | 333 (100%)                | -              | -            | <i>A. marginale</i>       |

(Continued)

| Strains      | Genes(nt)    |              |              | Bacteria              |
|--------------|--------------|--------------|--------------|-----------------------|
|              | <i>rrs</i>   | <i>gltA</i>  | <i>groEL</i> |                       |
| ZJANSA-43    | 1442 (99.6%) | 1186 (99.6%) | 862 (98.8%)  | <i>A. marginale</i>   |
| WHANSA-12    | 978 (99.6%)  | -            | -            | <i>A. marginale</i>   |
| WHANSA-13    | 1428 (99.5%) | -            | -            | <i>A. marginale</i>   |
| WHANSA-15    | 1439 (99.9%) | -            | -            | <i>A. marginale</i>   |
| WHANSA-19    | 898 (99.8%)  | -            | -            | <i>A. marginale</i>   |
| WHANSA-22    | 953 (99.6%)  | -            | -            | <i>A. marginale</i>   |
| WHANSA-24-1  | 1348 (98.5%) | -            | 625 (86.4%)  | <i>A. bovis</i>       |
| WHANSA-24-2  | 1438 (99.2%) | -            | 1020 (84.9%) | <i>A. platys</i>      |
| WHANSA-29    | 1402 (99.7%) | 685 (83.2%)  | 491 (91.0%)  | <i>C. A. boleense</i> |
| WHANSA-29-12 | 1381 (99.8%) | -            | -            | <i>A. marginale</i>   |
| WHANSA-36    | 1349 (99.9%) | -            | -            | <i>A. marginale</i>   |
| WHANSA-37    | 1361 (99.9%) | -            | -            | <i>A. marginale</i>   |
| WHANSA-38    | 1429 (99.9%) | -            | -            | <i>A. marginale</i>   |
| WHANSA-39    | 1432 (99.4%) | -            | -            | <i>A. marginale</i>   |
| WHANSA-40    | 1433 (99.2%) | -            | -            | <i>A. platys</i>      |
| WHANSA-45-1  | 1393 (98.1%) | -            | -            | <i>A. platys</i>      |
| WHANSA-45-2  | 1440 (98.5%) | -            | -            | <i>A. marginale</i>   |
| WHANSA-47-1  | 990 (99.8%)  | -            | -            | <i>A. marginale</i>   |
| WHANSA-48    | 1409 (99.6%) | -            | -            | <i>A. marginale</i>   |
| WHANSA-52-1  | 466 (99.8%)  | -            | -            | <i>A. marginale</i>   |
| WHANSA-52    | 454 (98.4%)  | -            | -            | <i>A. bovis</i>       |
| WHANSA-53-2  | 526 (98.7%)  | -            | -            | <i>A. marginale</i>   |
| WHANSA-53    | 525 (99.2%)  | -            | -            | <i>A. bovis</i>       |
| WHANSA-6-1   | 1436 (98.6%) | -            | 628 (87.2%)  | <i>A. bovis</i>       |
| WHANSA-6-2   | 1442 (99.7%) | 1219 (99.6%) | -            | <i>A. marginale</i>   |
| WHANSA-6-3   | 1437 (99.2%) | -            | 1050 (84.7%) | <i>A. platys</i>      |
| WHANSA-60-2  | 595 (99.5%)  | -            | -            | <i>A. marginale</i>   |
| WHANSA-63-1  | 582 (100%)   | -            | -            | <i>A. marginale</i>   |
| WHANSA-63    | 519 (99.4%)  | -            | -            | <i>A. platys</i>      |
| WHANSA-7-4   | 1427 (97.9%) | -            | -            | <i>A. platys</i>      |
| WHANSA-71-1  | 516 (99.8%)  | -            | -            | <i>A. marginale</i>   |
| WHANSA-71    | 555 (99.5%)  | -            | -            | <i>A. platys</i>      |
| WHANSA-79    | 509 (98.6%)  | -            | -            | <i>A. marginale</i>   |
| WHANSA-8-2   | 1429 (99.5%) | -            | -            | <i>A. marginale</i>   |
| WHANSA-8     | 1430 (99.4%) | -            | 1020 (84.4%) | <i>A. platys</i>      |
| WHANSA-82-1  | 573 (98.6%)  | -            | -            | <i>A. bovis</i>       |
| WHANSA-82    | 658 (99.2%)  | -            | -            | <i>A. marginale</i>   |
| WHANSA-83    | 398 (99.7%)  | -            | -            | <i>A. marginale</i>   |
| WHANSA-89    | 395 (99.0%)  | -            | -            | <i>A. marginale</i>   |

(Continued)

| Strains                         | Genes(nt)    |              |              | Bacteria                    |
|---------------------------------|--------------|--------------|--------------|-----------------------------|
|                                 | <i>rrs</i>   | <i>gltA</i>  | <i>groEL</i> |                             |
| WHANSA-92                       | 381 (99.2%)  | -            | -            | <i>A. marginale</i>         |
| WHANSA-122                      | 240 (100%)   | -            | -            | <i>C. A. rodmosense</i>     |
| WHANSA-161                      | 240 (100%)   | -            | -            | <i>C. A. rodmosense</i>     |
| <i>Ehrlichia</i> sp. WHANSA-181 | 650 (99.8%)  | -            | -            | <i>Ehrlichia</i> sp. EHh317 |
| WHANSA-97                       | 1300 (99.9%) | 1000 (97.4%) | 400 (96.6%)  | <i>R. bellii</i>            |
| WHANSA-146                      | 1300 (98.4%) | -            | -            | <i>C. R. as</i>             |
| WHANSA-108                      | 240 (98.7%)  | -            | -            | <i>C. N. mik</i>            |
| WHANSA-133                      | 240 (98.7%)  | -            | -            | <i>C. N. mik</i>            |
| WHANSA-LabF24                   | 650 (100%)   | -            | -            | <i>R. japonica</i>          |
| WHANSA-LabP60                   | 650 (99.5%)  | -            | -            | <i>R. japonica</i>          |
| WHANSA-LabP66                   | 650 (100%)   | -            | -            | <i>R. japonica</i>          |
| WHANSA-LabP86                   | 650 (100%)   | -            | -            | <i>R. japonica</i>          |
| WHANSA-LabP95                   | 650 (100%)   | -            | -            | <i>R. japonica</i>          |
| <i>Armigeres subalbatus</i>     |              |              |              |                             |
| Egg                             |              |              |              |                             |
| WHARSE-LabF5                    | 650 (100%)   | -            | -            | <i>R. japonica</i>          |
| Larvae                          |              |              |              |                             |
| WHARSL-11-1                     | 336 (97.6%)  | -            | -            | <i>A. phagocytophilum</i>   |
| WHARSL-11                       | 343 (97.4%)  | -            | -            | <i>A. bovis</i>             |
| WHARSL-12                       | 342 (97.7%)  | -            | -            | <i>A. phagocytophilum</i>   |
| WHARSL-16-1                     | 374 (98.7%)  | -            | -            | <i>A. phagocytophilum</i>   |
| WHARSL-18-1                     | 361 (99.4%)  | -            | -            | <i>A. marginale</i>         |
| WHARSL-18                       | 340 (97.4%)  | -            | -            | <i>A. phagocytophilum</i>   |
| WHARSL-2-1                      | 389 (99.2%)  | -            | -            | <i>A. phagocytophilum</i>   |
| WHARSL-2                        | 1342 (99.3%) | -            | 563 (92.0%)  | <i>C. A. boleense</i>       |
| WHARSL-21-1                     | 373 (99.2%)  | -            | -            | <i>A. marginale</i>         |
| WHARSL-22                       | 342 (97.4%)  | -            | -            | <i>A. bovis</i>             |
| WHARSL-24                       | 343 (98.0%)  | -            | -            | <i>A. bovis</i>             |
| WHARSL-26-1                     | 351 (99.4%)  | -            | -            | <i>A. marginale</i>         |
| WHARSL-26                       | 336 (97.3%)  | -            | -            | <i>A. phagocytophilum</i>   |
| WHARSL-28-1                     | 372 (98.4%)  | -            | -            | <i>A. bovis</i>             |
| WHARSL-28                       | 970 (99.6%)  | -            | -            | <i>A. marginale</i>         |
| WHARSL-3-1                      | 375 (99.7%)  | -            | -            | <i>A. marginale</i>         |
| WHARSL-3                        | 324 (97.8%)  | -            | -            | <i>A. phagocytophilum</i>   |
| WHARSL-30                       | 1381 (99.3%) | 826 (57.6%)  | 1041 (84.9%) | <i>A. platys</i>            |
| WHARSL-32                       | 333 (98.8%)  | -            | -            | <i>A. platys</i>            |
| WHARSL-33                       | 343 (97.1%)  | -            | -            | <i>A. bovis</i>             |
| WHARSL-34                       | 343 (96.8%)  | -            | -            | <i>A. phagocytophilum</i>   |
| WHARSL-35                       | 332 (97.6%)  | -            | -            | <i>A. phagocytophilum</i>   |

(Continued)

| Strains        | Genes(nt)    |              |              | Bacteria                  |
|----------------|--------------|--------------|--------------|---------------------------|
|                | <i>rrs</i>   | <i>gltA</i>  | <i>groEL</i> |                           |
| WHARSL-38-1    | 1376 (99.8%) | 1180 (99.5%) | 850 (98.6%)  | <i>A. marginale</i>       |
| WHARSL-38-2    | 1441 (98.5%) | -            | 628 (86.9%)  | <i>A. bovis</i>           |
| WHARSL-9       | 335 (97.9%)  | -            | -            | <i>A. phagocytophilum</i> |
| WHARSL-LabF8   | 650 (100%)   | -            | -            | <i>R. japonica</i>        |
| WHARSL-LabF12  | 650 (100%)   | -            | -            | <i>R. japonica</i>        |
| WHARSL-LabF14  | 650 (100%)   | -            | -            | <i>R. japonica</i>        |
| WHARSL-LabF21  | 650 (100%)   | -            | -            | <i>R. japonica</i>        |
| WHARSL-LabF34  | 650 (100%)   | -            | -            | <i>R. japonica</i>        |
| WHARSL-LabF56  | 650 (100%)   | -            | -            | <i>R. japonica</i>        |
| WHARSL-LabF115 | 650 (100%)   | -            | -            | <i>R. japonica</i>        |
| WHARSL-LabF130 | 650 (100%)   | -            | -            | <i>R. japonica</i>        |
| Pupae          |              |              |              |                           |
| WHARSP-17      | 1381 (99.4%) | -            | 993 (85.1%)  | <i>A. platys</i>          |
| WHARSP-19      | 1378 (99.9%) | -            | 850 (98.6%)  | <i>A. marginale</i>       |
| WHARSP-2-1     | 371 (98.9%)  | -            | -            | <i>A. bovis</i>           |
| WHARSP-30-1    | 372 (98.7%)  | -            | -            | <i>A. bovis</i>           |
| WHARSP-30-2    | 343 (98.8%)  | -            | -            | <i>A. marginale</i>       |
| WHARSP-38      | 1372 (99.6%) | 954 (84.2%)  | -            | <i>C. A. boleense</i>     |
| WHARSP-LabF3   | 650 (100%)   | -            | -            | <i>R. japonica</i>        |
| WHARSP-LabF11  | 650 (100%)   | -            | -            | <i>R. japonica</i>        |
| WHARSP-LabF18  | 650 (100%)   | -            | -            | <i>R. japonica</i>        |
| WHARSP-LabF21  | 650 (100%)   | -            | -            | <i>R. japonica</i>        |
| WHARSP-LabF23  | 650 (100%)   | -            | -            | <i>R. japonica</i>        |
| WHARSP-LabF39  | 650 (100%)   | -            | -            | <i>R. japonica</i>        |
| WHARSP-LabF42  | 650 (100%)   | -            | -            | <i>R. japonica</i>        |
| Adult          |              |              |              |                           |
| JXARSA-1       | 348 (99.4%)  | -            | -            | <i>A. phagocytophilum</i> |
| JXARSA-15      | 354 (99.2%)  | -            | -            | <i>A. phagocytophilum</i> |
| JXARSA-2       | 356 (99.1%)  | -            | -            | <i>A. phagocytophilum</i> |
| JXARSA-29      | 1359 (99.2%) | 832 (58.2%)  | 866 (86.7%)  | <i>A. platys</i>          |
| JXARSA-32      | 343 (99.4%)  | -            | -            | <i>A. phagocytophilum</i> |
| JXARSA-33      | 1360 (99.3%) | 679 (83.2%)  | 530 (92.6%)  | <i>C. A. boleense</i>     |
| JXARSA-5       | 1371 (99.1%) | 678 (83.2%)  | -            | <i>C. A. boleense</i>     |
| WHARSA-14-1    | 321 (99.4%)  | -            | -            | <i>A. marginale</i>       |
| WHARSA-14      | 1002 (98.8%) | -            | 1017 (84.2%) | <i>A. platys</i>          |
| WHARSA-30-1    | 361 (98.9%)  | -            | -            | <i>A. bovis</i>           |
| WHARSA-30      | 1380 (99.9%) | -            | 850 (98.0%)  | <i>A. marginale</i>       |
| WHARSA-40-1    | 1380 (99.7%) | -            | 835 (98.6%)  | <i>A. marginale</i>       |
| WHARSA-40-2    | 1349 (98.5%) | -            | 628 (86.3%)  | <i>A. bovis</i>           |

(Continued)

| Strains                         | Genes(nt)    |              |              | Bacteria                    |
|---------------------------------|--------------|--------------|--------------|-----------------------------|
|                                 | <i>rrs</i>   | <i>gltA</i>  | <i>groEL</i> |                             |
| WHARSA-47-1                     | 1380 (99.5%) | -            | -            | <i>A. platys</i>            |
| WHARSA-47-2                     | 1378 (99.9%) | -            | -            | <i>A. marginale</i>         |
| WHARSA-5                        | 366 (98.9%)  | -            | -            | <i>A. phagocytophilum</i>   |
| WHARSA-7                        | 1380 (99.6%) | -            | 1047 (83.7%) | <i>A. platys</i>            |
| ZJARSA-11                       | 358 (98.9%)  | -            | -            | <i>A. platys</i>            |
| ZJARSA-2                        | 349 (98.6%)  | -            | -            | <i>A. phagocytophilum</i>   |
| ZJARSA-4                        | 1393 (99.3%) | 685 (82.5%)  | 491 (91.0%)  | <i>C. A. boleense</i>       |
| ZJARSA-8                        | 1380 (99.6%) | 618 (56.5%)  | 987 (84.6%)  | <i>A. platys</i>            |
| WHARSA-80                       | 240 (100%)   | -            | -            | <i>C. A. rodmosense</i>     |
| WHARSA-86                       | 650 (99.1%)  | -            | -            | <i>A. phagocytophilum</i>   |
| WHARSA-103                      | 650 (99.2%)  | -            | -            | <i>A. phagocytophilum</i>   |
| WHARSA-106                      | 650 (98.9%)  | -            | -            | <i>A. bovis</i>             |
| WHARSA-121                      | 650 (99.2%)  | -            | -            | <i>A. bovis</i>             |
| WHARSA-132                      | 650 (99.2%)  | -            | -            | <i>A. bovis</i>             |
| WHARSA-87-1                     | 650 (99.3%)  | -            | -            | <i>A. phagocytophilum</i>   |
| <i>Ehrlichia</i> sp. WHARSA-87  | 650 (99.6%)  | -            | 450 (89.4%)  | <i>Ehrlichia</i> sp. EHh317 |
| <i>Ehrlichia</i> sp. WHARSA-128 | 650 (99.4%)  | -            | -            | <i>Ehrlichia</i> sp. NS101  |
| <i>Ehrlichia</i> sp. WHARSA-134 | 1110 (99.7%) | -            | -            | <i>Ehrlichia</i> sp. EHh317 |
| WHARSA-85                       | 1110 (99.3%) | -            | -            | <i>C. N. mik</i>            |
| WHARSA-107                      | 650 (99.6%)  | -            | -            | <i>C. N. mik</i>            |
| WHARSA-115                      | 650 (99.6%)  | -            | -            | <i>C. N. mik</i>            |
| WHARSA-118                      | 650 (99.6%)  | -            | -            | <i>C. N. mik</i>            |
| WHARSA-135                      | 650 (99.6%)  | -            | -            | <i>C. N. mik</i>            |
| WHARSA-140                      | 650 (99.6%)  | -            | -            | <i>C. N. mik</i>            |
| WHARSA-142                      | 650 (99.6%)  | -            | -            | <i>C. N. mik</i>            |
| WHARSA-LabF12                   | 650 (100%)   | -            | -            | <i>R. japonica</i>          |
| WHARSA-LabP24                   | 650 (100%)   | -            | -            | <i>R. japonica</i>          |
| WHARSA-LabP51                   | 650 (100%)   | -            | -            | <i>R. japonica</i>          |
| WHARSA-LabP70                   | 650 (100%)   | -            | -            | <i>R. japonica</i>          |
| WHARSA-LabP71                   | 650 (100%)   | -            | -            | <i>R. japonica</i>          |
| <i>Aedes albopictus</i>         |              |              |              |                             |
| Larvae                          |              |              |              |                             |
| WHAEL-10                        | 357 (99.2%)  | -            | -            | <i>A. phagocytophilum</i>   |
| WHAEL-14                        | 346 (99.3%)  | -            | -            | <i>A. phagocytophilum</i>   |
| WHAEL-16                        | 357 (99.3%)  | -            | -            | <i>A. phagocytophilum</i>   |
| WHAEL-17-1                      | 1346 (99.3%) | 1201 (99.5%) | 856 (98.6%)  | <i>A. marginale</i>         |
| WHAEL-17-2                      | 938 (99.2%)  | 832 (57.9%)  | 1014 (84.5%) | <i>A. platys</i>            |
| WHAEL-23                        | 356 (99.2%)  | -            | -            | <i>A. phagocytophilum</i>   |
| WHAEL-25                        | 339 (99.4%)  | -            | -            | <i>A. phagocytophilum</i>   |

(Continued)

| Strains                           | Genes(nt)    |             |              | Bacteria                    |
|-----------------------------------|--------------|-------------|--------------|-----------------------------|
|                                   | <i>rrs</i>   | <i>gltA</i> | <i>groEL</i> |                             |
| WHAEL-45                          | 1356 (99.2%) | 685 (82.5%) | -            | <i>C. A. boleense</i>       |
| WHAEL-7-1                         | 345 (99.4%)  | -           | -            | <i>A. bovis</i>             |
| WHAEL-7-2                         | 374 (99.2%)  | -           | -            | <i>A. marginale</i>         |
| WHAEL-69                          | 650 (98.8%)  | -           | -            | <i>A. phagocytophilum</i>   |
| WHAEL-81                          | 650 (99.8%)  | -           | -            | <i>A. marginale</i>         |
| WHAEL-84                          | 550 (99.1%)  | -           | -            | <i>A. bovis</i>             |
| WHAEL-109                         | 650 (99.1%)  | -           | -            | <i>A. bovis</i>             |
| WHAEL-112                         | 240 (100%)   | -           | -            | <i>C. A. rodmosense</i>     |
| WHAEL-56                          | 535 (99.6%)  | -           | -            | <i>A. marginale</i>         |
| WHAEL-79-1                        | 668 (99.6%)  | -           | -            | <i>A. phagocytophilum</i>   |
| WHAEL-79-2                        | 667 (98.9%)  | -           | -            | <i>A. bovis</i>             |
| <i>Ehrlichia</i> sp. WHAEL-56-1   | 650 (99.9%)  | -           | -            | <i>Ehrlichia</i> sp. EHh317 |
| <i>Ehrlichia</i> sp. WHAEL-79     | 650 (100%)   | -           | 450 (89.4%)  | <i>Ehrlichia</i> sp. EHh317 |
| <i>Ehrlichia</i> sp. WHAEL-110    | 650 (99.9%)  | -           | -            | <i>Ehrlichia</i> sp. EHh317 |
| <i>Ehrlichia</i> sp. WHAEL-113    | 650 (99.2%)  | -           | -            | <i>Ehrlichia</i> sp. NS101  |
| <i>Ehrlichia</i> sp. WHAEL-132    | 650 (99.1%)  | -           | 450 (89.2%)  | <i>Ehrlichia</i> sp. EHh317 |
| <i>Ehrlichia</i> sp. WHAEL-139    | 1110 (99.2%) | -           | -            | <i>Ehrlichia</i> sp. EHh317 |
| <i>Ehrlichia</i> sp. WHAEL-144    | 1110 (99.3%) | -           | -            | <i>Ehrlichia</i> sp. EHh317 |
| WHAEL-125                         | 1110 (98.8%) | -           | -            | <i>C. N. mik</i>            |
| WHAEL-130                         | 650 (99.6%)  | -           | -            | <i>C. N. mik</i>            |
| WHAEL-LabF6                       | 650 (100%)   | -           | -            | <i>R. japonica</i>          |
| WHAEL-LabF18                      | 650 (100%)   | -           | -            | <i>R. japonica</i>          |
| WHAEL-LabF21                      | 650 (100%)   | -           | -            | <i>R. japonica</i>          |
| WHAEL-LabF34                      | 650 (100%)   | -           | -            | <i>R. japonica</i>          |
| WHAEL-LabF37                      | 650 (100%)   | -           | -            | <i>R. japonica</i>          |
| WHAEL-LabF39                      | 1100 (100%)  | -           | -            | <i>R. japonica</i>          |
| WHAEL-LabF49                      | 650 (100%)   | -           | -            | <i>R. japonica</i>          |
| WHAEL-LabF50                      | 650 (100%)   | -           | -            | <i>R. japonica</i>          |
| WHAEL-LabF52                      | 650 (100%)   | -           | -            | <i>R. japonica</i>          |
| WHAEL-LabF54                      | 650 (100%)   | -           | -            | <i>R. japonica</i>          |
| <i>Ehrlichia</i> sp. WHAEL-LabF19 | 650 (99.4%)  | -           | -            | <i>Ehrlichia</i> sp. EHh317 |
| <i>Ehrlichia</i> sp. WHAEL-LabF20 | 650 (99.4%)  | -           | -            | <i>Ehrlichia</i> sp. EHh317 |
| Pupae                             |              |             |              |                             |
| WHAEP-26                          | 938 (98.9%)  | 823 (57.7%) | 1047 (83.5%) | <i>A. platys</i>            |
| WHAEP-33                          | 1380 (99.7%) | -           | 850 (98.4%)  | <i>A. marginale</i>         |
| WHAEP-67                          | 240 (100%)   | -           | -            | <i>C. A. rodmosense</i>     |
| <i>Ehrlichia</i> sp. WHAEP-65     | 240 (100%)   | -           | -            | <i>Ehrlichia</i> sp. EHh317 |
| <i>Ehrlichia</i> sp. WHAEP-69     | 240 (100%)   | -           | -            | <i>Ehrlichia</i> sp. EHh317 |
| WHAEP-55                          | 240 (98.7%)  | -           | -            | <i>C. N. mik</i>            |



(Continued)

| Strains                            | Genes(nt)    |              |              | Bacteria                    |
|------------------------------------|--------------|--------------|--------------|-----------------------------|
|                                    | <i>rrs</i>   | <i>gltA</i>  | <i>groEL</i> |                             |
| WHAEP-61                           | 240 (98.7%)  | -            | -            | <i>C. N. mik</i>            |
| WHAEP-LabF43                       | 650 (100%)   | -            | -            | <i>R. japonica</i>          |
| WHAEP-LabF45                       | 650 (100%)   | -            | -            | <i>R. japonica</i>          |
| Adult                              |              |              |              |                             |
| ZJAEAA-1                           | 1382 (99.7%) | 1195 (99.5%) | 817 (98.5%)  | <i>A. marginale</i>         |
| ZJAEAA-4                           | 345 (99.4%)  | -            | -            | <i>A. phagocytophilum</i>   |
| ZJAEAA-5-1                         | 377 (99.5%)  | -            | -            | <i>A. marginale</i>         |
| ZJAEAA-5                           | 1379 (99.4%) | 666 (84.5%)  | 491 (92.0%)  | <i>C. A. boleense</i>       |
| WHAEEA-39                          | 240 (98.7%)  | -            | -            | <i>C. N. mik</i>            |
| WHAEEA-LabF26                      | 1100 (99.8%) | -            | -            | <i>R. japonica</i>          |
| WHAEEA-LabP5                       | 650 (100%)   | -            | -            | <i>R. japonica</i>          |
| WHAEEA-LabP12                      | 650 (100%)   | -            | -            | <i>R. japonica</i>          |
| <i>Ehrlichia</i> sp. WHAEAA-LabP15 | 650 (99.6%)  | -            | -            | <i>Ehrlichia</i> sp. EHh317 |
| WHAEEA-LabP33                      | 650 (100%)   | -            | -            | <i>R. japonica</i>          |
| WHAEEA-LabP44                      | 650 (99.5%)  | -            | -            | <i>R. japonica</i>          |
| WHAEEA-LabP57                      | 650 (99.5%)  | -            | -            | <i>R. japonica</i>          |
| WHAEEA-LabP58                      | 650 (99.5%)  | -            | -            | <i>R. japonica</i>          |
| WHAEEA-LabP68                      | 650 (100%)   | -            | -            | <i>R. japonica</i>          |
| WHAEEA-LabP82                      | 650 (99.5%)  | -            | -            | <i>R. japonica</i>          |
| <i>Culex quinquefasciatus</i>      |              |              |              |                             |
| Egg                                |              |              |              |                             |
| WHCUQE-LabF3                       | 650 (100%)   | -            | -            | <i>R. japonica</i>          |
| WHCUQE-LabF19                      | 650 (100%)   | -            | -            | <i>R. japonica</i>          |
| Larvae                             |              |              |              |                             |
| WHCUQL-18                          | 356 (97.2%)  | -            | -            | <i>A. phagocytophilum</i>   |
| WHCUQL-2                           | 356 (98.9%)  | -            | -            | <i>A. phagocytophilum</i>   |
| WHCUQL-4                           | 356 (98.0%)  | -            | -            | <i>A. phagocytophilum</i>   |
| WHCUQL-46                          | 1323 (99.4%) | 682 (82.5%)  | -            | <i>C. A. boleense</i>       |
| WHCUQL-65                          | 240 (100%)   | -            | -            | <i>C. A. rodmosense</i>     |
| WHCUQL-98                          | 240 (100%)   | -            | -            | <i>A. marginale</i>         |
| WHCUQL-112                         | 240 (97.3%)  | -            | -            | <i>C. A. rodmosense</i>     |
| WHCUQL-118                         | 240 (98.3%)  | -            | -            | <i>A. marginale</i>         |
| WHCUQL-83                          | 240 (100%)   | -            | -            | <i>E. chaffeensis</i>       |
| WHCUQL-53                          | 240 (98.7%)  | -            | -            | <i>C. N. mik</i>            |
| WHCUQL-110                         | 240 (98.7%)  | -            | -            | <i>C. N. mik</i>            |
| WHCUQL-LabF8                       | 650 (100%)   | -            | -            | <i>R. japonica</i>          |
| WHCUQL-LabF14                      | 650 (100%)   | -            | -            | <i>R. japonica</i>          |
| WHCUQL-LabF89                      | 650 (100%)   | -            | -            | <i>R. japonica</i>          |
| WHCUQL-LabP6                       | 650 (100%)   | -            | -            | <i>R. japonica</i>          |

(Continued)

| Strains                         | Genes(nt)    |             |              | Bacteria                    |
|---------------------------------|--------------|-------------|--------------|-----------------------------|
|                                 | <i>rrs</i>   | <i>gltA</i> | <i>groEL</i> |                             |
| WHCUQL-LabP11                   | 650 (99.5%)  | -           | -            | <i>R. japonica</i>          |
| WHCUQL-LabP27                   | 650 (100%)   | -           | -            | <i>R. japonica</i>          |
| WHCUQL-LabP34                   | 650 (99.5%)  | -           | -            | <i>R. japonica</i>          |
| WHCUQL-LabP39                   | 650 (100%)   | -           | -            | <i>R. japonica</i>          |
| WHCUQL-LabP60                   | 650 (100%)   | -           | -            | <i>R. japonica</i>          |
| Pupae                           |              |             |              |                             |
| WHCUQP-88                       | 650 (99.2%)  | -           | -            | <i>A. bovis</i>             |
| <i>Ehrlichia</i> sp. WHCUQP-70  | 240 (100%)   | -           | -            | <i>Ehrlichia</i> sp. EHH317 |
| WHCUQP-78                       | 240 (98.7%)  | -           | -            | <i>C. N. mik</i>            |
| WHCUQP-LabF5                    | 650 (100%)   | -           | -            | <i>R. japonica</i>          |
| WHCUQP-LabF7                    | 650 (100%)   | -           | -            | <i>R. japonica</i>          |
| WHCUQP-LabF68                   | 1100 (99.5%) | -           | -            | <i>R. japonica</i>          |
| WHCUQP-LabF78                   | 650 (100%)   | -           | -            | <i>R. japonica</i>          |
| WHCUQP-LabF79                   | 650 (100%)   | -           | -            | <i>R. japonica</i>          |
| WHCUQP-LabF81                   | 650 (100%)   | -           | -            | <i>R. japonica</i>          |
| Adult                           |              |             |              |                             |
| WHCUQA-73                       | 240 (100%)   | -           | -            | <i>C. A. rodmosense</i>     |
| WHCUQA-81                       | 240 (100%)   | -           | -            | <i>C. A. rodmosense</i>     |
| WHCUQA-68                       | 240 (100%)   | -           | -            | <i>E. chaffeensis</i>       |
| <i>Ehrlichia</i> sp. WHCUQA-72  | 240 (100%)   | -           | -            | <i>Ehrlichia</i> sp. EHH317 |
| <i>Ehrlichia</i> sp. WHCUQA-111 | 240 (100%)   | -           | -            | <i>Ehrlichia</i> sp. EHH317 |
| WHCUQA-97                       | 1300 (99.8%) | 1000 (100%) | 700 (99.6%)  | <i>R. monacensis</i>        |
| WHCUQA-63                       | 240 (98.7%)  | -           | -            | <i>C. N. mik</i>            |
| WHCUQA-LabF56                   | 650 (100%)   | -           | -            | <i>R. japonica</i>          |
| WHCUQA-LabP13                   | 650 (99.5%)  | -           | -            | <i>R. japonica</i>          |
| WHCUQA-LabP36                   | 650 (99.5%)  | -           | -            | <i>R. japonica</i>          |
| WHCUQA-LabP43                   | 650 (99.5%)  | -           | -            | <i>R. japonica</i>          |
| WHCUQA-LabP48                   | 650 (99.5%)  | -           | -            | <i>R. japonica</i>          |
| WHCUQA-LabP88                   | 650 (100%)   | -           | -            | <i>R. japonica</i>          |
| <i>Culex tritaeniorhynchus</i>  |              |             |              |                             |
| Egg                             |              |             |              |                             |
| WHCUTE-LabF3                    | 650 (100%)   | -           | -            | <i>R. sibirica</i>          |
| WHCUTE-LabF5                    | 650 (99.8%)  | -           | -            | <i>R. monacensis</i>        |
| Larvae                          |              |             |              |                             |
| WHCUTL-97                       | 650 (99.2%)  | -           | -            | <i>A. platys</i>            |
| WHCUTL-131                      | 650 (98.3%)  | -           | -            | <i>A. platys</i>            |
| WHCUTL-65                       | 650 (97.6%)  | -           | -            | <i>C. R. ct</i>             |
| WHCUTL-121                      | 240 (98.7%)  | -           | -            | <i>C. N. mik</i>            |
| WHCUTL-LabF11                   | 650 (100%)   | -           | -            | <i>R. sibirica</i>          |

(Continued)

| Strains        | Genes(nt)    |              |              | Bacteria                  |
|----------------|--------------|--------------|--------------|---------------------------|
|                | <i>rrs</i>   | <i>gltA</i>  | <i>groEL</i> |                           |
| WHCUTL-LabF24  | 650 (99.8%)  | -            | -            | <i>R. monacensis</i>      |
| WHCUTL-LabF28  | 1100 (100%)  | -            | -            | <i>R. sibirica</i>        |
| WHCUTL-LabF41  | 650 (100%)   | -            | -            | <i>R. japonica</i>        |
| WHCUTL-LabF43  | 650 (100%)   | -            | -            | <i>R. japonica</i>        |
| WHCUTL-LabF80  | 1100 (99.9%) | -            | -            | <i>R. monacensis</i>      |
| Pupae          |              |              |              |                           |
| WHCUTP-70      | 240 (100%)   | -            | -            | <i>E. chaffeensis</i>     |
| WHCUTP-78      | 240 (98.7%)  | -            | -            | <i>C. N. mik</i>          |
| WHCUTP-122     | 240 (98.7%)  | -            | -            | <i>C. N. mik</i>          |
| WHCUTP-LabF7   | 650 (100%)   | -            | -            | <i>R. sibirica</i>        |
| WHCUTP-LabF9   | 1100 (99.8%) | -            | -            | <i>R. monacensis</i>      |
| WHCUTP-LabF18  | 1100 (99.9%) | -            | -            | <i>R. monacensis</i>      |
| WHCUTP-LabF23  | 650 (99.8%)  | -            | -            | <i>R. monacensis</i>      |
| WHCUTP-LabF33  | 1100 (100%)  | -            | -            | <i>R. japonica</i>        |
| WHCUTP-LabF61  | 1100 (99.8%) | -            | -            | <i>R. monacensis</i>      |
| WHCUTP-LabF64  | 650 (99.8%)  | -            | -            | <i>R. monacensis</i>      |
| WHCUTP-LabF94  | 1100 (99.8%) | -            | -            | <i>R. monacensis</i>      |
| WHCUTP-LabF97  | 1100 (99.9%) | -            | -            | <i>R. monacensis</i>      |
| WHCUTP-LabF110 | 1100 (99.8%) | -            | -            | <i>R. monacensis</i>      |
| WHCUTP-LabF112 | 1100 (99.9%) | -            | -            | <i>R. monacensis</i>      |
| WHCUTP-LabF118 | 650 (99.8%)  | -            | -            | <i>R. monacensis</i>      |
| Adult          |              |              |              |                           |
| WHCUTA-25      | 1381 (99.6%) | -            | -            | <i>A. marginale</i>       |
| WHCUTA-8       | 1381 (99.4%) | -            | -            | <i>A. marginale</i>       |
| ZJCUTA-10      | 1370 (99.6%) | -            | -            | <i>A. marginale</i>       |
| ZJCUTA-2       | 1379 (99.3%) | -            | -            | <i>A. marginale</i>       |
| ZJCUTA-30      | 1351 (99.8%) | -            | -            | <i>A. marginale</i>       |
| ZJCUTA-5       | 1380 (99.6%) | -            | -            | <i>A. marginale</i>       |
| ZJCUTA-6       | 1380 (99.7%) | -            | -            | <i>A. marginale</i>       |
| WHCUTA-99      | 650 (99.1%)  | -            | -            | <i>A. phagocytophilum</i> |
| WHCUTA-111     | 650 (99.2%)  | -            | -            | <i>A. platys</i>          |
| WHCUTA-122     | 650 (99.4%)  | -            | -            | <i>A. platys</i>          |
| WHCUTA-123     | 650 (98.6%)  | -            | -            | <i>A. platys</i>          |
| WHCUTA-137     | 650 (99.4%)  | -            | -            | <i>A. platys</i>          |
| WHCUTA-141     | 650 (98.5%)  | -            | -            | <i>A. platys</i>          |
| WHCUTA-121     | 1300 (99.3%) | 1000 (76.7%) | -            | <i>R. nc</i>              |
| WHCUTA-130     | 1300 (99.3%) | 1000 (76.7%) | -            | <i>R. nc</i>              |
| WHCUTA-LabF5   | 650 (100%)   | -            | -            | <i>R. japonica</i>        |
| WHCUTA-LabF11  | 1100 (100%)  | -            | -            | <i>R. japonica</i>        |

(Continued)

| Strains        | Genes(nt)    |             |              | Bacteria             |
|----------------|--------------|-------------|--------------|----------------------|
|                | <i>rrs</i>   | <i>gltA</i> | <i>groEL</i> |                      |
| WHCUTA-LabF12  | 1100 (99.9%) | -           | -            | <i>R. japonica</i>   |
| WHCUTA-LabF13  | 650 (99.7%)  | -           | -            | <i>R. sibirica</i>   |
| WHCUTA-LabF15  | 1100 (100%)  | -           | -            | <i>R. japonica</i>   |
| WHCUTA-LabF20  | 1100 (99.7%) | -           | -            | <i>R. monacensis</i> |
| WHCUTA-LabF33  | 1100 (100%)  | -           | -            | <i>R. japonica</i>   |
| WHCUTA-LabF34  | 1100 (100%)  | -           | -            | <i>R. japonica</i>   |
| WHCUTA-LabF35  | 650 (99.7%)  | -           | -            | <i>R. sibirica</i>   |
| WHCUTA-LabF42  | 1100 (100%)  | -           | -            | <i>R. japonica</i>   |
| WHCUTA-LabF46  | 650 (99.7%)  | -           | -            | <i>R. sibirica</i>   |
| WHCUTA-LabF47  | 650 (100%)   | -           | -            | <i>R. japonica</i>   |
| WHCUTA-LabF51  | 650 (100%)   | -           | -            | <i>R. japonica</i>   |
| WHCUTA-LabF53  | 650 (100%)   | -           | -            | <i>R. japonica</i>   |
| WHCUTA-LabF54  | 1100 (99.9%) | -           | -            | <i>R. japonica</i>   |
| WHCUTA-LabF59  | 650 (99.7%)  | -           | -            | <i>R. sibirica</i>   |
| WHCUTA-LabF63  | 1100 (99.8%) | -           | -            | <i>R. japonica</i>   |
| WHCUTA-LabF64  | 1100 (99.8%) | -           | -            | <i>R. sibirica</i>   |
| WHCUTA-LabF70  | 1100 (99.7%) | -           | -            | <i>R. sibirica</i>   |
| WHCUTA-LabF71  | 650 (100%)   | -           | -            | <i>R. japonica</i>   |
| WHCUTA-LabF84  | 650 (100%)   | -           | -            | <i>R. japonica</i>   |
| WHCUTA-LabF91  | 650 (100%)   | -           | -            | <i>R. japonica</i>   |
| WHCUTA-LabP31  | 650 (100%)   | -           | -            | <i>R. japonica</i>   |
| WHCUTA-LabP52  | 650 (100%)   | -           | -            | <i>R. japonica</i>   |
| WHCUTA-LabP114 | 650 (99.6%)  | -           | -            | <i>R. japonica</i>   |
| WHCUTA-LabP157 | 650 (99.5%)  | -           | -            | <i>R. monacensis</i> |
| WHCUTA-LabP162 | 650 (100%)   | -           | -            | <i>R. sibirica</i>   |

<sup>a</sup> The abbreviation is the same as in Tables 1 and 3.

<sup>b</sup> Nucleotide sequence identity compared to the reference sequences from GenBank.

<sup>c</sup> “-”, not available.

Supplementary Table S2. Prevalence of Rickettsiales in adult mosquito sampled from three regions of China.

| Species | Location | Years | <i>Anaplasma</i> <sup>a</sup> |                |              |              |              | <i>Ehrlichia</i> |              |              | <i>Rickettsia</i> |               |              | <i>C.N.mik</i> | Total |              |             |       |
|---------|----------|-------|-------------------------------|----------------|--------------|--------------|--------------|------------------|--------------|--------------|-------------------|---------------|--------------|----------------|-------|--------------|-------------|-------|
|         |          |       | <i>A.bov</i>                  | <i>C.A.bol</i> | <i>A.mar</i> | <i>A.pha</i> | <i>A.pla</i> | <i>C.A.rod</i>   | <i>E.cha</i> | <i>E.ehh</i> | <i>E.ns</i>       | <i>C.R.as</i> | <i>R.bel</i> |                |       | <i>R.mon</i> | <i>R.nc</i> |       |
| Ae.a.   | Hubei    | 2015  | 0                             | 0              | 0            | 0            | 0            | 0                | 0            | 0            | 0                 | 0             | 0            | 0              | 0     | 1            | 1/144       |       |
|         | Zhejiang | 2014  | 0                             | 1              | 2            | 1            | 0            | 0                | 0            | 0            | 0                 | 0             | 0            | 0              | 0     | 0            | 0           | 4/6   |
| An.s.   | Hubei    | 2014  | 5                             | 1              | 25           | 0            | 8            | 0                | 0            | 0            | 0                 | 0             | 0            | 0              | 0     | 0            | 0           | 39/96 |
|         |          | 2015  | 0                             | 0              | 0            | 0            | 0            | 2                | 0            | 1            | 0                 | 1             | 1            | 0              | 0     | 2            | 7/96        |       |
|         | Jiangxi  | 2014  | 2                             | 0              | 4            | 0            | 2            | 0                | 0            | 0            | 0                 | 0             | 0            | 0              | 0     | 0            | 8/38        |       |
|         | Zhejiang | 2014  | 0                             | 0              | 1            | 0            | 0            | 0                | 0            | 0            | 0                 | 0             | 0            | 0              | 0     | 0            | 0           | 1/48  |
| Ar.s.   | Hubei    | 2014  | 2                             | 0              | 4            | 1            | 3            | 0                | 0            | 0            | 0                 | 0             | 0            | 0              | 0     | 0            | 0           | 10/48 |
|         |          | 2015  | 3                             | 0              | 0            | 3            | 0            | 1                | 0            | 2            | 1                 | 0             | 0            | 0              | 0     | 7            | 17/55       |       |
|         | Jiangxi  | 2014  | 0                             | 2              | 0            | 4            | 1            | 0                | 0            | 0            | 0                 | 0             | 0            | 0              | 0     | 0            | 7/42        |       |
|         | Zhejiang | 2014  | 0                             | 1              | 0            | 1            | 2            | 0                | 0            | 0            | 0                 | 0             | 0            | 0              | 0     | 0            | 0           | 4/14  |
| Cu.q.   | Hubei    | 2014  | 0                             | 0              | 0            | 0            | 0            | 0                | 0            | 0            | 0                 | 0             | 0            | 0              | 0     | 0            | 0           | 0/48  |
|         |          | 2015  | 0                             | 0              | 0            | 0            | 0            | 2                | 1            | 2            | 0                 | 0             | 0            | 1              | 0     | 1            | 7/96        |       |
| Cu.t.   | Hubei    | 2014  | 0                             | 0              | 2            | 0            | 0            | 0                | 0            | 0            | 0                 | 0             | 0            | 0              | 0     | 0            | 0           | 2/48  |
|         |          | 2015  | 0                             | 0              | 0            | 1            | 5            | 0                | 0            | 0            | 0                 | 0             | 0            | 0              | 2     | 0            | 8/96        |       |
|         | Zhejiang | 2014  | 0                             | 0              | 5            | 0            | 0            | 0                | 0            | 0            | 0                 | 0             | 0            | 0              | 0     | 0            | 5/96        |       |
| Total   |          |       | 12                            | 5              | 43           | 11           | 21           | 5                | 1            | 5            | 1                 | 1             | 1            | 1              | 2     | 11           | 120/971     |       |

<sup>a</sup> Abbreviations are the same as those in Table 1.

Supplementary Table S3. Prevalence of Rickettsiales in eggs, larvae and pupae sampled from Hubei Province, China.

| Species     | Years | <i>Anaplasma</i> <sup>a</sup> |                |              |              |              | <i>Ehrlichia</i> |              |       | <i>Rickettsia</i> | C.N.mik | Total |        |
|-------------|-------|-------------------------------|----------------|--------------|--------------|--------------|------------------|--------------|-------|-------------------|---------|-------|--------|
|             |       | <i>A.bov</i>                  | <i>C.A.bol</i> | <i>A.pla</i> | <i>A.mar</i> | <i>A.pha</i> | <i>C.A.rod</i>   | <i>E.cha</i> | E.ehh | E.ns              |         |       | C.R.ct |
| Egg         |       |                               |                |              |              |              |                  |              |       |                   |         |       |        |
| <i>Ae.a</i> | 2014  | 0                             | 0              | 0            | 0            | 0            | 0                | 0            | 0     | 0                 | 0       | 0     | 0/0    |
|             | 2015  | 0                             | 0              | 0            | 0            | 0            | 0                | 0            | 0     | 0                 | 0       | 0     | 0/0    |
| <i>An.s</i> | 2014  | 0                             | 0              | 0            | 1            | 1            | 0                | 0            | 0     | 0                 | 0       | 0     | 2/4    |
|             | 2015  | 0                             | 0              | 0            | 0            | 0            | 0                | 0            | 0     | 0                 | 0       | 0     | 0/5    |
| <i>Ar.s</i> | 2014  | 0                             | 0              | 0            | 0            | 0            | 0                | 0            | 0     | 0                 | 0       | 0     | 0/0    |
|             | 2015  | 0                             | 0              | 0            | 0            | 0            | 0                | 0            | 0     | 0                 | 0       | 0     | 0/0    |
| <i>Cu.q</i> | 2014  | 0                             | 0              | 0            | 0            | 0            | 0                | 0            | 0     | 0                 | 0       | 0     | 0/0    |
|             | 2015  | 0                             | 0              | 0            | 0            | 0            | 0                | 0            | 0     | 0                 | 0       | 0     | 0/0    |
| <i>Cu.t</i> | 2014  | 0                             | 0              | 0            | 0            | 0            | 0                | 0            | 0     | 0                 | 0       | 0     | 0/10   |
|             | 2015  | 0                             | 0              | 0            | 0            | 0            | 0                | 0            | 0     | 0                 | 0       | 0     | 0/0    |
| Subtotal    |       | 0                             | 0              | 0            | 1            | 1            | 0                | 0            | 0     | 0                 | 0       | 0     | 2/19   |
| Larvae      |       |                               |                |              |              |              |                  |              |       |                   |         |       |        |
| <i>Ae.a</i> | 2014  | 1                             | 1              | 1            | 2            | 5            | 0                | 0            | 0     | 0                 | 0       | 0     | 10/48  |
|             | 2015  | 3                             | 0              | 0            | 2            | 2            | 1                | 0            | 6     | 1                 | 0       | 2     | 17/96  |
| <i>An.s</i> | 2014  | 2                             | 0              | 1            | 5            | 5            | 0                | 0            | 0     | 0                 | 0       | 0     | 13/48  |
|             | 2015  | 0                             | 0              | 0            | 0            | 0            | 0                | 0            | 0     | 0                 | 0       | 0     | 0/40   |
| <i>Ar.s</i> | 2014  | 6                             | 1              | 2            | 6            | 10           | 0                | 0            | 0     | 0                 | 0       | 0     | 25/48  |
| <i>Cu.q</i> | 2014  | 0                             | 1              | 0            | 0            | 3            | 0                | 0            | 0     | 0                 | 0       | 0     | 4/48   |
|             | 2015  | 0                             | 0              | 0            | 2            | 0            | 2                | 1            | 0     | 0                 | 0       | 2     | 7/96   |
| <i>Cu.t</i> | 2014  | 0                             | 0              | 0            | 0            | 0            | 0                | 0            | 0     | 0                 | 0       | 0     | 0/96   |
|             | 2015  | 0                             | 0              | 2            | 0            | 0            | 0                | 0            | 0     | 0                 | 1       | 1     | 4/48   |
| Subtotal    |       | 12                            | 3              | 6            | 17           | 25           | 3                | 1            | 6     | 1                 | 1       | 5     | 80/528 |
| Pupae       |       |                               |                |              |              |              |                  |              |       |                   |         |       |        |
| <i>Ae.a</i> | 2014  | 0                             | 0              | 1            | 1            | 0            | 0                | 0            | 0     | 0                 | 0       | 0     | 2/48   |
|             | 2015  | 0                             | 0              | 0            | 0            | 0            | 1                | 0            | 2     | 0                 | 0       | 2     | 5/96   |
| <i>An.s</i> | 2014  | 0                             | 1              | 1            | 1            | 0            | 0                | 0            | 0     | 0                 | 0       | 0     | 3/48   |
|             | 2015  | 0                             | 0              | 0            | 0            | 0            | 0                | 0            | 0     | 0                 | 0       | 1     | 1/40   |
| <i>Ar.s</i> | 2014  | 2                             | 1              | 1            | 2            | 0            | 0                | 0            | 0     | 0                 | 0       | 0     | 6/48   |
| <i>Cu.q</i> | 2015  | 1                             | 0              | 0            | 0            | 0            | 0                | 0            | 1     | 0                 | 0       | 1     | 3/144  |
| <i>Cu.t</i> | 2014  | 0                             | 0              | 0            | 0            | 0            | 0                | 0            | 0     | 0                 | 0       | 0     | 0/48   |
|             | 2015  | 0                             | 0              | 0            | 0            | 0            | 0                | 1            | 0     | 0                 | 0       | 2     | 3/82   |
| Subtotal    |       | 3                             | 2              | 3            | 4            | 0            | 1                | 1            | 3     | 0                 | 0       | 6     | 23/554 |

<sup>a</sup> Abbreviations are the same as those in Tables 1 and 3.

Supplementary Table S4. Primers used in this study.

| Bacteria                | gene         | Sequences (5' → 3')                     | Position <sup>a</sup> | Reference  |
|-------------------------|--------------|-----------------------------------------|-----------------------|------------|
| Rickettsiales           | <i>rrs</i>   | Eh-out1: TTGAGAGTTTGATCCTGGCTCAGAACG(+) | 1-27                  | 26         |
|                         |              | Eh-out2: CACCTCTACACTAGGAATTCGGCTATC(-) | 653-627               | 26         |
|                         |              | Eh-gs1: GTAATAACTGTATAATCCCTG(+)        | 167-187               | 26         |
|                         |              | Eh-gs2: GTACCGTCATTATCTTCCCTA(-)        | 448-428               | 26         |
| <i>Anaplasma</i>        | <i>rrs</i>   | GTTTGATCCTGGCTCAGAA (+)                 | 15-33                 | This study |
|                         |              | TACACTAGGAATTCGGCTATC (-)               | 652-632               | This study |
|                         |              | CTAATACCGTATATGCYC (+)                  | 173-190               | This study |
|                         |              | GTACCGTCATTATCWTCC (-)                  | 453-436               | This study |
| <i>Anaplasma</i>        | <i>rrs</i>   | GGATAGCCACTRGAARTGGTG(+)                | 151-171               | This study |
|                         |              | CGTGCTGACTTGACATCAT(-)                  | 1172-1154             | This study |
|                         |              | CATCTCACGACACGAGCTG(-)                  | 1049-1031             | This study |
|                         |              | CTGTCTGGTCCGGTACTGAC(+)                 | 700-719               | This study |
|                         |              | TGGTCCGGTACTGACRCT(+)                   | 705-722               | This study |
|                         |              | TGCCTCCTTDCGGTTGGC(-)                   | 1425-1408             | This study |
| <i>Ehrlichia</i>        | <i>rrs</i>   | GAATAGCCATTAGAAATGATG(+)                | 155-175               | This study |
|                         |              | GTCAGTATCGAACCAGATAG(-)                 | 723-704               | This study |
|                         |              | GTATCGAACCAGATAGCCG(-)                  | 719-701               | This study |
|                         |              | CGGCTATCTGGTTCGATAC(+)                  | 701-719               | This study |
|                         |              | CTATCTGGTTCGATACTGAC(+)                 | 704-723               | This study |
|                         |              | GCTTCCTTKCGGTTAGCAC(-)                  | 1427-1409             | This study |
| <i>Rickettsia</i>       | <i>rrs</i>   | GTACGGAATAACTTTTAGAAAT(+)               | 147-168               | This study |
|                         |              | CATGATGACTTGACRTCCT(-)                  | 1175-1157             | This study |
|                         |              | CATCTCACGACACGAGCTG(-)                  | 1052-1034             | This study |
|                         |              | GAAGGCGRTCATYTRGGCT(+)                  | 693-711               | This study |
|                         |              | GRTCATYTRGGCTRCAACTG(+)                 | 699-718               | This study |
|                         |              | CTGCCTCTTGCGTTAGCT(-)                   | 1427-1410             | This study |
| <i>Ca. Neoehrlichia</i> | <i>rrs</i>   | GACAGGTAATACCRTATAATCCCT(+)             | 123-146               | This study |
|                         |              | GTCAGAACTGAGCCAGATAG(-)                 | 675-656               | This study |
|                         |              | CTGAGCCAGATAGTCGC(-)                    | 668-652               | This study |
|                         |              | GCGACTATCTGGCTCAG(+)                    | 652-668               | This study |
|                         |              | CTATCTGGCTCAGTTCTGAC(+)                 | 656-675               | This study |
|                         |              | TGCCTCCTTACGGTTAG(-)                    | 1382-1366             | This study |
| <i>A. platys</i>        | <i>groEL</i> | AGTCGATTAGGGAAGTAGTAC(+)                | 38-58                 | This study |
|                         |              | AGGATGGCTACAAGGTAATG(+)                 | 149-168               | This study |
|                         |              | GCGTCCTCTACTCTGTCTT(-)                  | 1199-1181             | This study |
| <i>A. marginale</i>     | <i>groEL</i> | ACATGCTCCATACTGACTGC(+)                 | 268-287               | This study |
|                         |              | AGATGAGATTGCACAGGTTG(+)                 | 420-439               | This study |
|                         |              | AGATGCAAGCGTGTATAGCAG(-)                | 1281-1261             | This study |
| <i>A. bovis</i>         | <i>groEL</i> | GCTGCTGCGATAGCTAATAT(+)                 | 196-215               | This study |
|                         |              | GATGGTACCACTACTTGTTC(+)                 | 256-276               | This study |
|                         |              | CTATGACTGCTATGTCACCA(-)                 | 883-864               | This study |

(Continued)

| Bacteria                    | Genes        | Sequences (5'→3')          | Position     | Reference  |
|-----------------------------|--------------|----------------------------|--------------|------------|
| <i>Ca. A. boleense</i>      | <b>groEL</b> | TAGAAGACGCGGTAGGCT(+)      | 47-64        | This study |
|                             |              | GTACTGCAGGCCCTAAAG(+)      | 65-82        | This study |
|                             |              | AACGTTCTCCAATATGGGAAG(-)   | 679-699      | This study |
| <i>Ehrlichia</i> sp. EHz317 | <b>groEL</b> | GAAGATGCTGTAGGRTGTACDGC(+) | 67-89        | This study |
|                             |              | ATTRCTCARAGTGCTTCHCARTG(+) | 217-239      | This study |
|                             |              | AGHGCTTCWCCTTCYACATCYTC(-) | 776-754      | This study |
| <i>Rickettsia</i>           | <b>groEL</b> | CCATTACATGATAGAATTGCAAT(+) | <b>groES</b> | This study |
|                             |              | GAATTGCAATAAAGCCTATCG(+)   | <b>groES</b> | This study |
|                             |              | CCATCATTGCTTTTCTTCTATC(-)  | 868-847      | This study |
| <i>A. platys</i>            | <b>gltA</b>  | TGRAAGAAAAGWCTGTTTTG(+)    | 2-21         | This study |
|                             |              | AGCTRTTTTTRGAGTYGGAG(+)    | 12-31        | This study |
|                             |              | GCTCTRGGRTCATARCTYTT(-)    | 926-907      | This study |
| <i>A. mraginale</i>         | <b>gltA</b>  | TGGTAGAAAAGCGATTTTAG(+)    | 2-22         | This study |
|                             |              | ATAAGCTTGCCCGTTATGC(+)     | 40-48        | This study |
|                             |              | CCGGTATAAAGTTGGCGT(-)      | 1235-1218    | This study |
| <i>Ca. A. boleense</i>      | <b>gltA</b>  | ATGTCTACTGCRGCWTGC(+)      | 1-18         | This study |
|                             |              | TACTGCRGCTWGCAGGTCT (+)    | 6-24         | This study |
|                             |              | CAGYAGTTCTMGCTAATG(-)      | 1012-996     | This study |
| <i>Rickettsia</i>           | <b>gltA</b>  | CCGGGYTTTATGTCTACTGC(+)    | 151-170      | This study |
|                             |              | CTTTATGTCTACTGCKTCTTG(+)   | 156-176      | This study |
|                             |              | AGCTGTCTWGGTCTGCTGATT(-)   | 1259-1239    | This study |

<sup>a</sup>The numbers correspond to genome positions of reference sequences from GenBank.



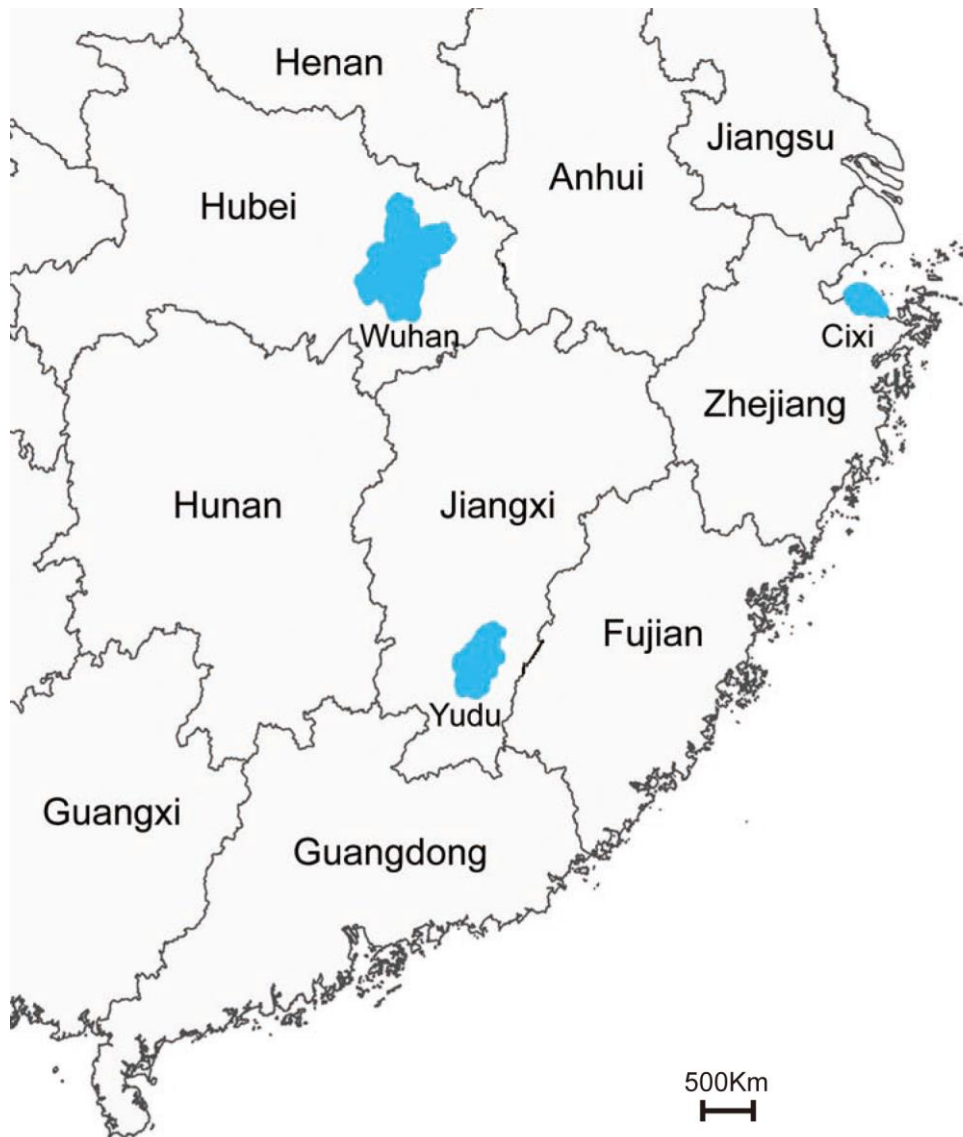

Supplementary Figure S1. Map showing the location of the collection areas in Hubei, Jiangxi, and Zhejiang provinces, China. The areas marked with blue represented the locations of Wuhan, Cixi and Yudu, respectively. The figure was generated using ArcGIS (version 10.0; <http://www.arcgis.com/feature/>).
